# Supplementary material
Source: PubMed Central journal article supplement (PMC6644347)
Supplement: ao8b02122_si_001.pdf [file ao8b02122_si_001.pdf]

## One-step synthesis, structure and band gap properties of SnO<sub>2</sub> nanoparticles made by a low temperature non-aqueous sol-gel technique

Mohamed Karmaoui,<sup>a,b\*</sup> Ana Belen Jorge,<sup>c</sup> Paul F. McMillan,<sup>d</sup> Abil E. Aliev,<sup>d</sup> Robert C. Pullar,<sup>a</sup> João António Labrincha,<sup>a</sup> David Maria Tobaldi<sup>a\*</sup>

***Dedicated to the memory of our friend and colleague, Dr Russell Binions***

<sup>a</sup> *Department of Materials and Ceramic Engineering/CICECO – Aveiro Institute of Materials, University of Aveiro, Campus Universitário de Santiago, 3810-193 Aveiro,*

*E-mail: [karmaoui@ua.pt](mailto:karmaoui@ua.pt); [david.tobaldi@ua.pt](mailto:david.tobaldi@ua.pt); [david@davidtobaldi.org](mailto:david@davidtobaldi.org)*

<sup>b</sup> *Département de Génie Chimique, Faculté de Chimie, Université des Sciences et de la technologie Mohamed-Boudiaf El Mnaouar, BP 1505, Bir El Djir 31000, Oran, Algérie.*

*E-mail: [karmaoui.mohamed@univ-usto.dz](mailto:karmaoui.mohamed@univ-usto.dz)*

<sup>c</sup> *Materials Research Institute, School of Engineering and Materials Science, Queen Mary University of London, Mile End Rd, London, E1 4NS, UK*

<sup>d</sup> *University College London, Christopher Ingold Building, 20 Gordon Street, London, WC1H 0AJ, UK*

**Electronic Supporting Information (ESI):**

**Figure S1.**  $^1\text{H}$  NMR spectrum of the filtered reaction solution measured in  $\text{CDCl}_3$  of the  $\text{SnO}_2$  nanoparticles.

**Figure S2.** Thermogravimetric analysis (TGA) of the  $\text{SnO}_2$  nanoparticle samples synthesised at different temperatures.

**Table S1.**  $^{13}\text{C}$  NMR chemical shift values for key organic species discussed in the text.

Figure S1

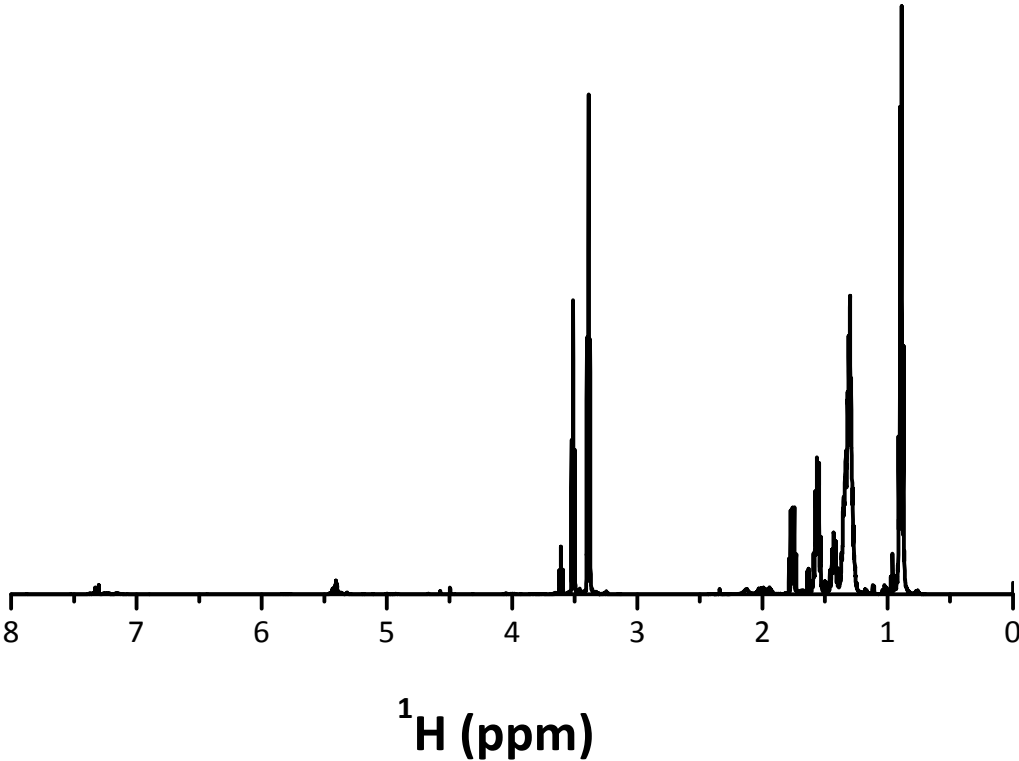

Figure S2

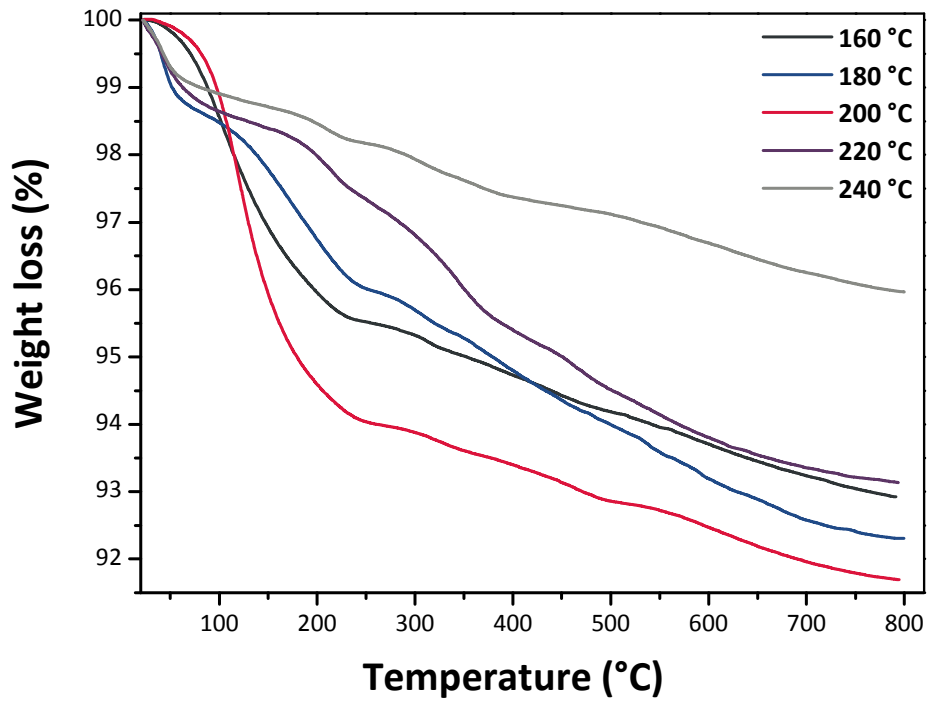

Table S1

|          | <b>Dihexyl ether</b> | <b>Hexyl alcohol</b> | <b>1-chlorohexane</b> |
|----------|----------------------|----------------------|-----------------------|
| <b>1</b> | 71.05                | 62.80                | 45.12                 |
| <b>2</b> | 31.85                | 32.79                | 32.79                 |
| <b>3</b> | 29.90                | 31.80                | 31.23                 |
| <b>4</b> | 26.01                | 25.59                | 26.71                 |
| <b>5</b> | 22.71                | 22.75                | 22.63                 |
| <b>6</b> | 14.02                | 14.07                | 14.02                 |
